# Supplementary material for: Bio- and oil-fouling resistance of ultrafiltration membranes controlled by star-shaped block and random copolymer coatings
Source: Royal Society of Chemistry journal article supplement (doi:10.1039/c3ra43209b), 2013-01-01
Supplement: c3ra43209b.pdf [file c3ra43209b.pdf]

Electronic Supplementary Information (ESI) for the manuscript entitled:

# Bio- and Oil-Fouling Resistance of Ultrafiltration Membranes Controlled by Star-Shaped Block and Random Copolymer Coatings

Dong-Gyun Kim,<sup>†a</sup> Hyo Kang,<sup>†\*b</sup> Sungsoo Han,<sup>b</sup> Hee Joong Kim,<sup>a</sup> and Jong-Chan Lee<sup>\*a</sup>

<sup>a</sup> School of Chemical and Biological Engineering and Institute of Chemical Processes, Seoul National University, 599 Gwanak-ro, Gwanak-gu, Seoul 151-742, Republic of Korea.

<sup>b</sup> Materials R&D Center, Samsung Advanced Institute of Technology, Samsung Electronics Co., Ltd., Nongseo-dong, Giheung-gu, Gyeonggi-do 446-712, Republic of Korea.

<sup>†</sup>These authors contributed equally to this paper.

\*Corresponding authors: J.-C. Lee (E-mail: jongchan@snu.ac.kr, Phone: +82 2 880 7070, Fax: +82 2 888 1604) and H. Kang (E-mail: denis.kang@samsung.com, Phone: +82 31 280 6626; Fax: +82 31 280 9359)

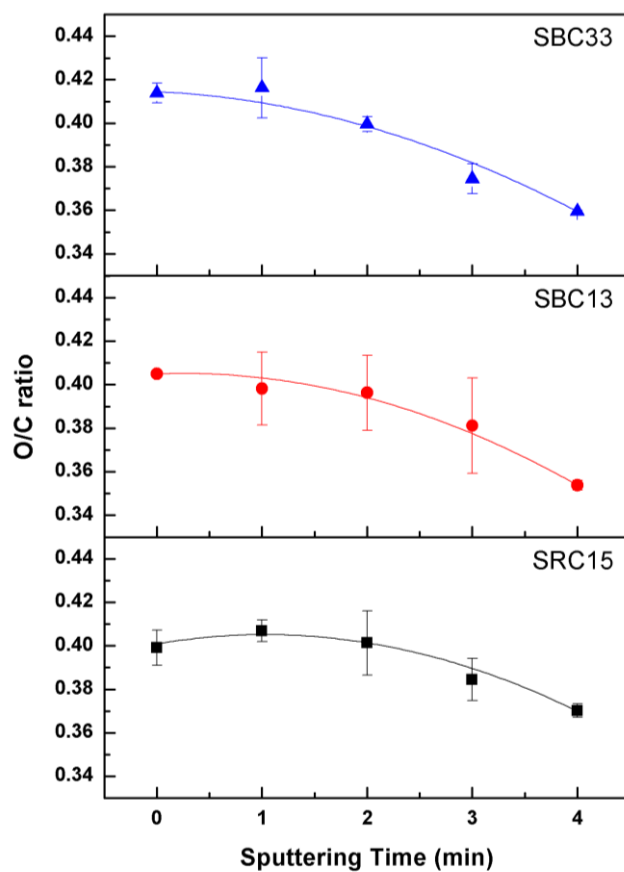

**Fig. S1** XPS depth profiles (O/C ratios) of SRC15, SBC13, and SBC33 films on PSf-coated silicon wafer obtained by sputtering of argon cluster ion beams.

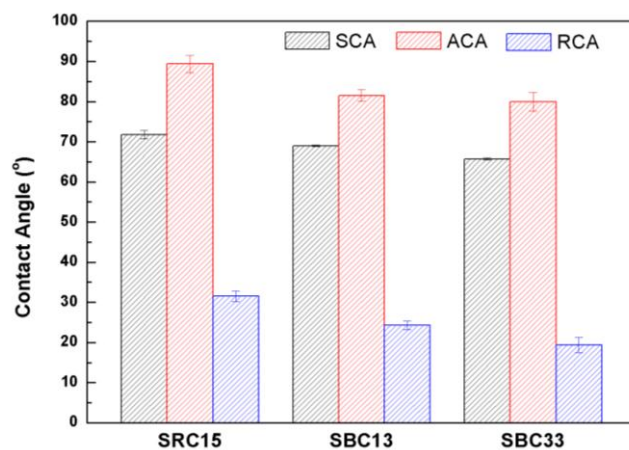

**Fig. S2** Comparison of static contact angle (SCA), advancing contact angle (ACA) and receding contact angle (RCA) of SRC15, SBC13, and SBC33 films on PSf-coated silicon wafer.

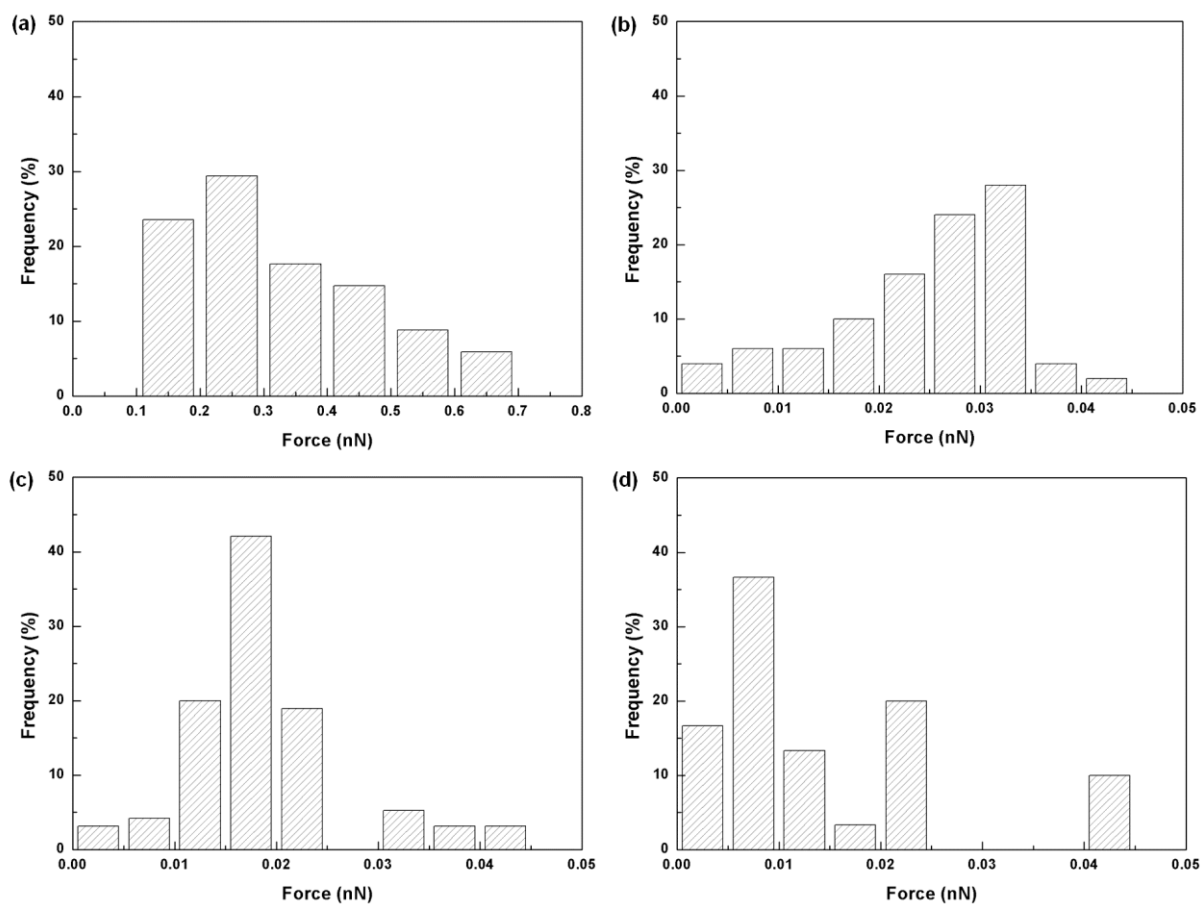

**Fig. S3** Interaction force histograms which were used to determine the mean interaction forces between BSA-tethered AFM tip and polymer films. (a) PSf, (b) SRC15, (c) SBC13, and (d) SBC33 films on PSf-coated silicon wafer.

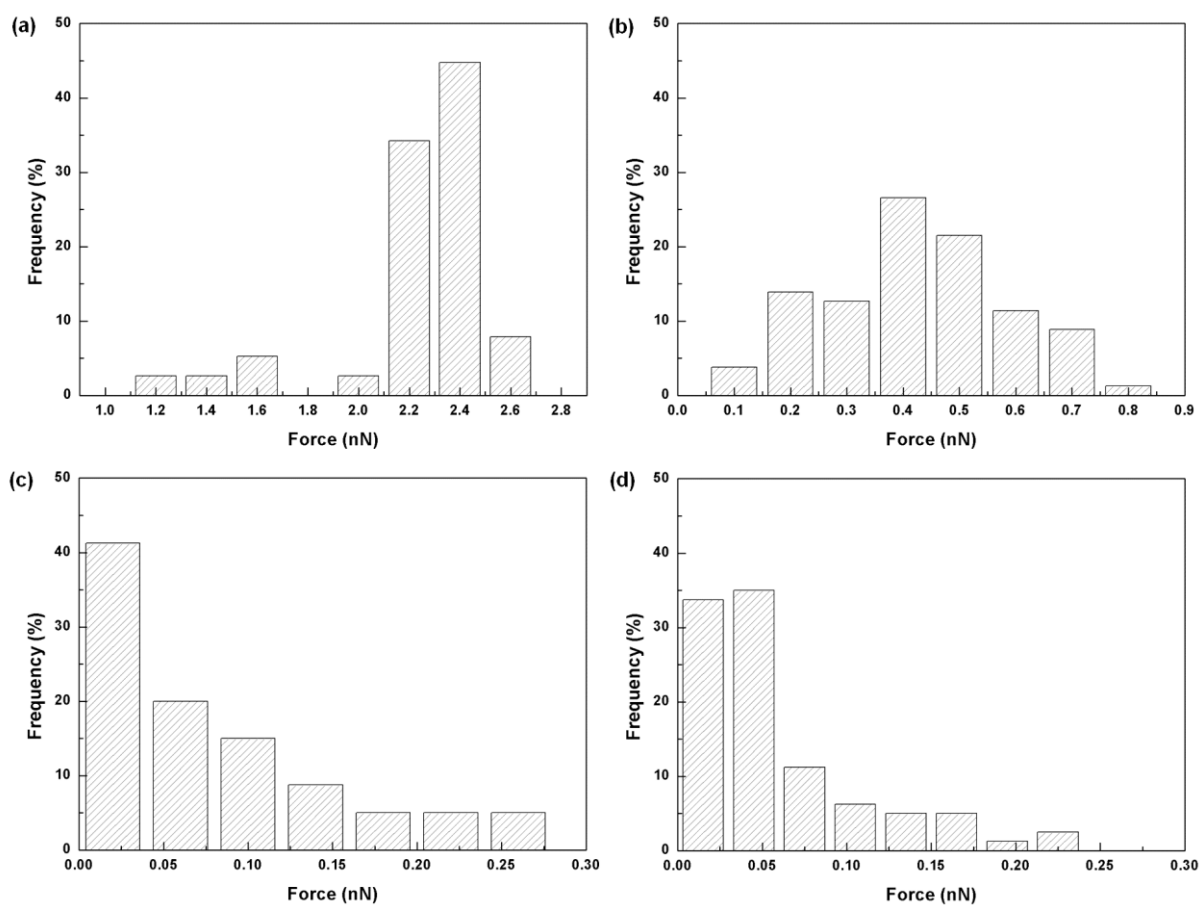

**Fig. S4** Interaction force histograms which were used to determine the mean interaction forces between dodecyl-tethered AFM tip and polymer films. (a) PSf, (b) SRC15, (c) SBC13, and (d) SBC33 films on PSf-coated silicon wafer.

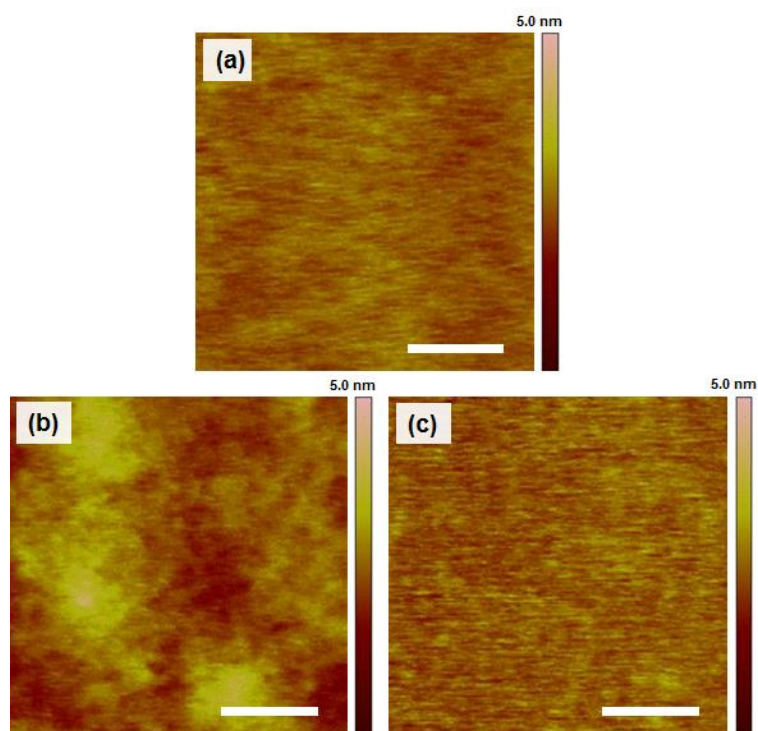

**Fig. S5** AFM height images of (a) SRC15, (b) SBC13, and (c) SBC33 thin films on PSf-coated silicon wafer (Scale bar: 100 nm).

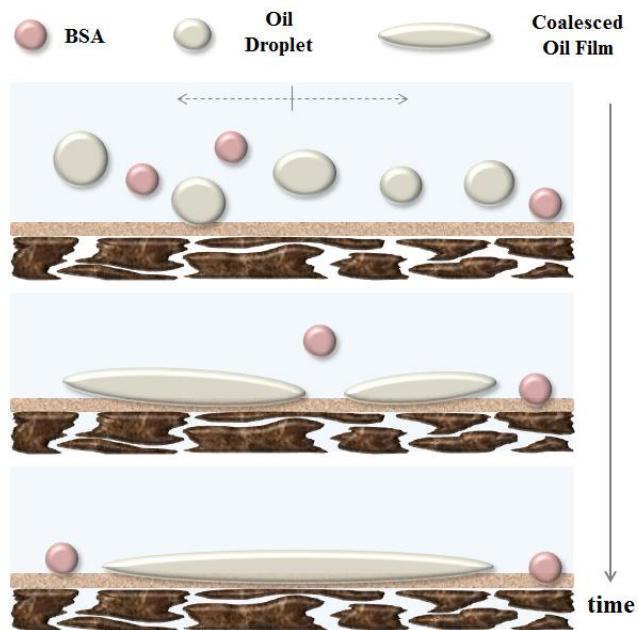

**Scheme S1** Fouling behaviors of BSA and oil against the membrane surface.
